# Supplementary material
Source: PubMed Central journal article supplement (PMC8961941)
Supplement: mmc1.pdf [file mmc1.pdf]

Fig. S1

A

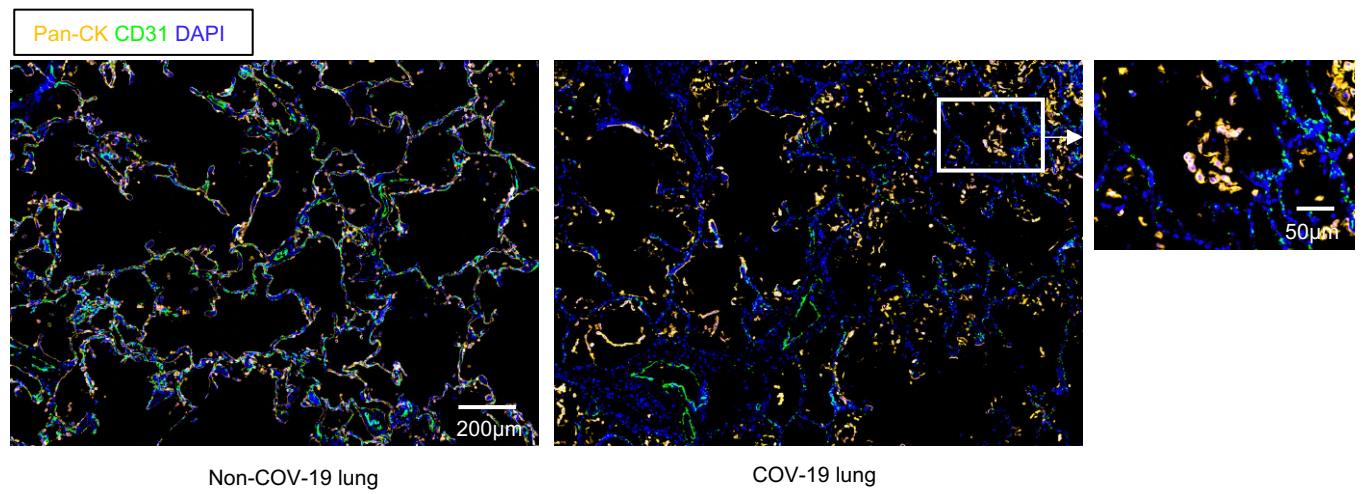

B

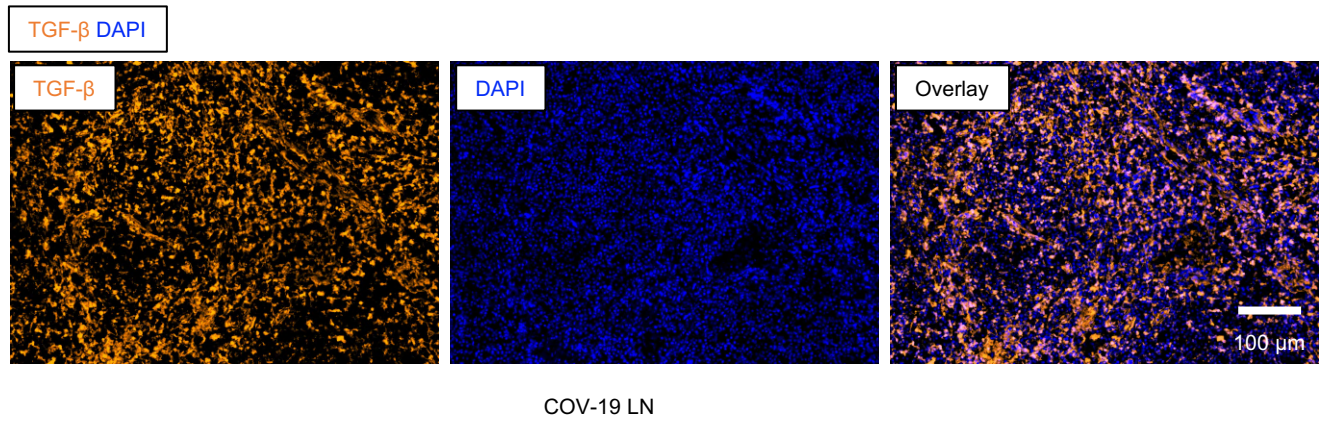

C

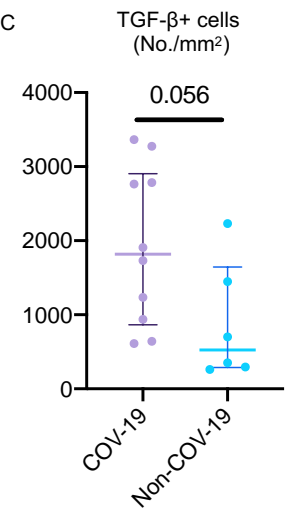

Fig. S2

A

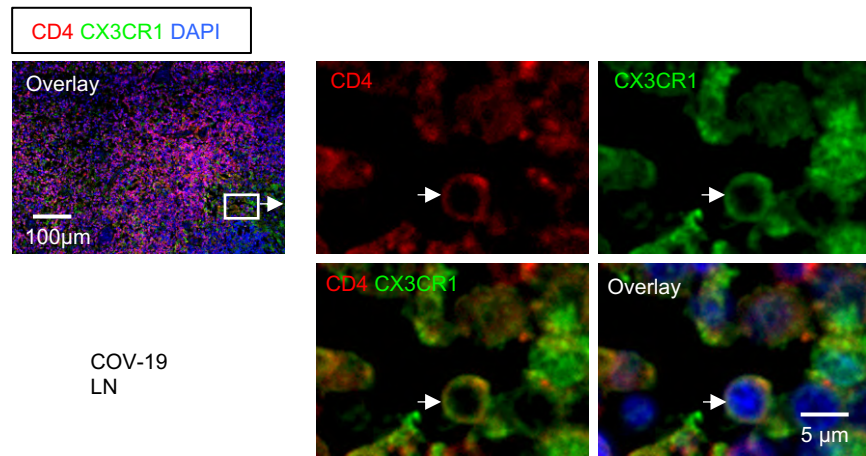

B

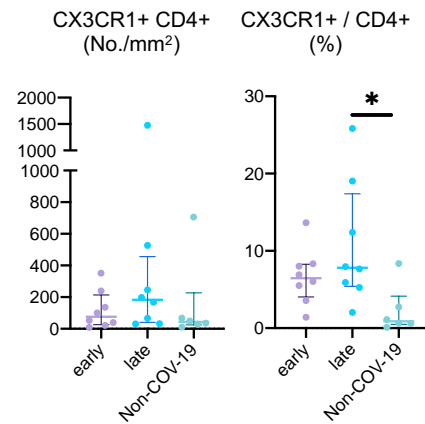

Fig. S3

Gated on live CD3<sup>+</sup> CD4<sup>+</sup> T cells

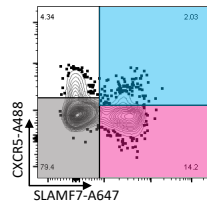

Gated on live CD3<sup>+</sup> CD4<sup>+</sup> T cells

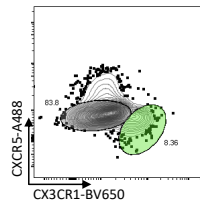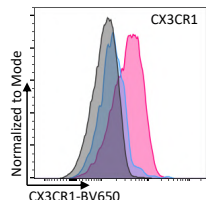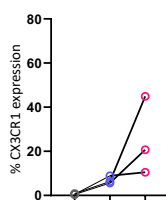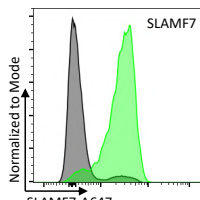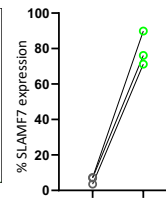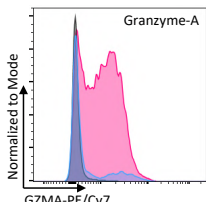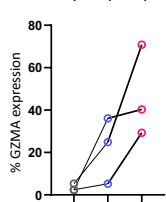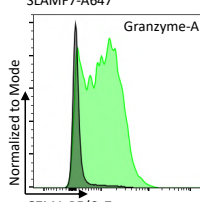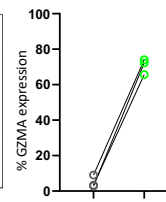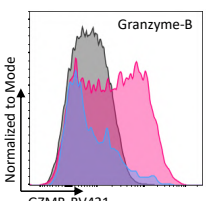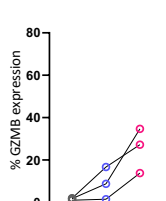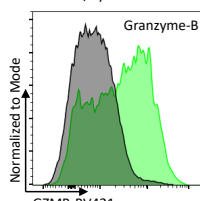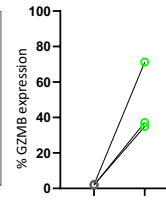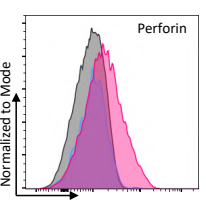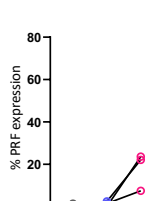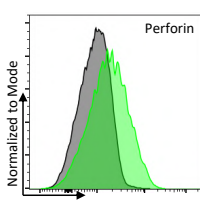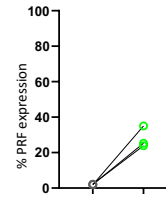

■ CD4<sup>+</sup> CXCR5<sup>+</sup> SLAMF7<sup>+</sup>  
■ CD4<sup>+</sup> CXCR5<sup>-</sup> SLAMF7<sup>-</sup>  
■ CD4<sup>+</sup> CXCR5<sup>-</sup> SLAMF7<sup>+</sup>

CD4 + + +  
 CXCR5 - + -  
 SLAMF7 - + +

■ CD4<sup>+</sup> CXCR5<sup>-</sup> CX3CR1<sup>-</sup>  
■ CD4<sup>+</sup> CXCR5<sup>-</sup> CX3CR1<sup>+</sup>

CD4 + +  
 CX3CR1 - +

Fig. S4

Peptide Stim

Gated on CD3<sup>+</sup>CD4<sup>+</sup>CCR7<sup>+</sup>CD45RA<sup>-</sup>CD38<sup>+</sup>CD69<sup>+</sup> events

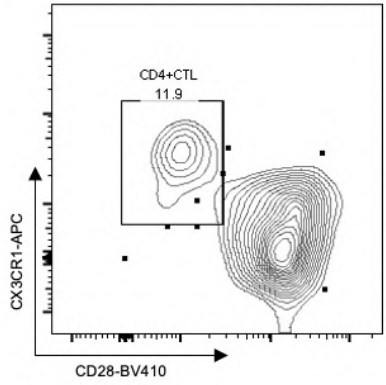

Subject #1

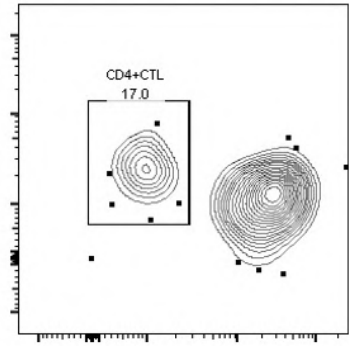

Subject #2

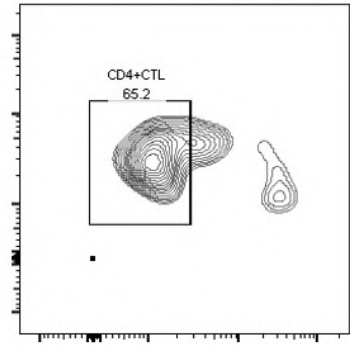

Subject #3
